# Supplementary material for: It takes two for chronic wounds to heal: dispersing bacterial biofilm and modulating inflammation with dual action plasma coatings
Source: Royal Society of Chemistry journal article supplement (doi:10.1039/c9ra09875e), 2020-01-01
Supplement: c9ra09875e1.pdf [file c9ra09875e1.pdf]

## Supporting information

### It takes two for chronic wounds to heal: Dispersing bacterial biofilm and modulating inflammation with dual action plasma coatings

Thomas Danny Michl<sup>\*a†</sup>, Dung Thuy Thi Tran<sup>a†</sup>, Hannah Frederike Kuckling<sup>a</sup>, Aigerim Zhalgasbaikyzy<sup>a</sup>, Barbora Ivanovská<sup>a</sup>, Laura Elena González García<sup>a</sup>, Rahul Madathiparambil Visalakshan<sup>a</sup> and Krasimir Vasilev<sup>a</sup>

<sup>a</sup> University of South Australia, School of Engineering, Mawson Lakes, Australia

<sup>†</sup> These two authors contributed equally

<sup>\*</sup> Corresponding author. Email: thomas.michl@unisa.edu.au

#### Additional images

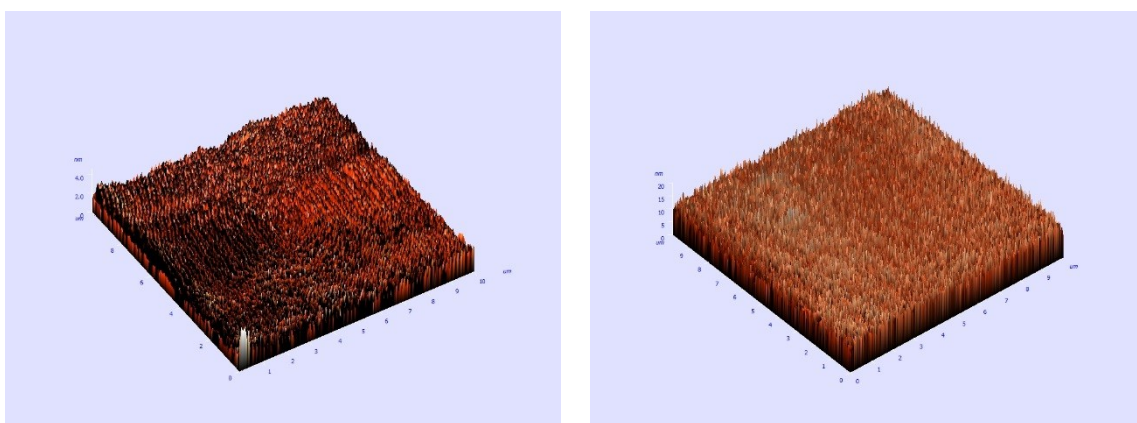

Figure S1: AFM images of TEMPOpp coatings. Left TEMPOpp 5min, right TEMPOpp 15min

|         |              |               |               |
|---------|--------------|---------------|---------------|
| Control | TEMPOpp 5min | TEMPOpp 15min | TEMPOpp 30min |
|---------|--------------|---------------|---------------|

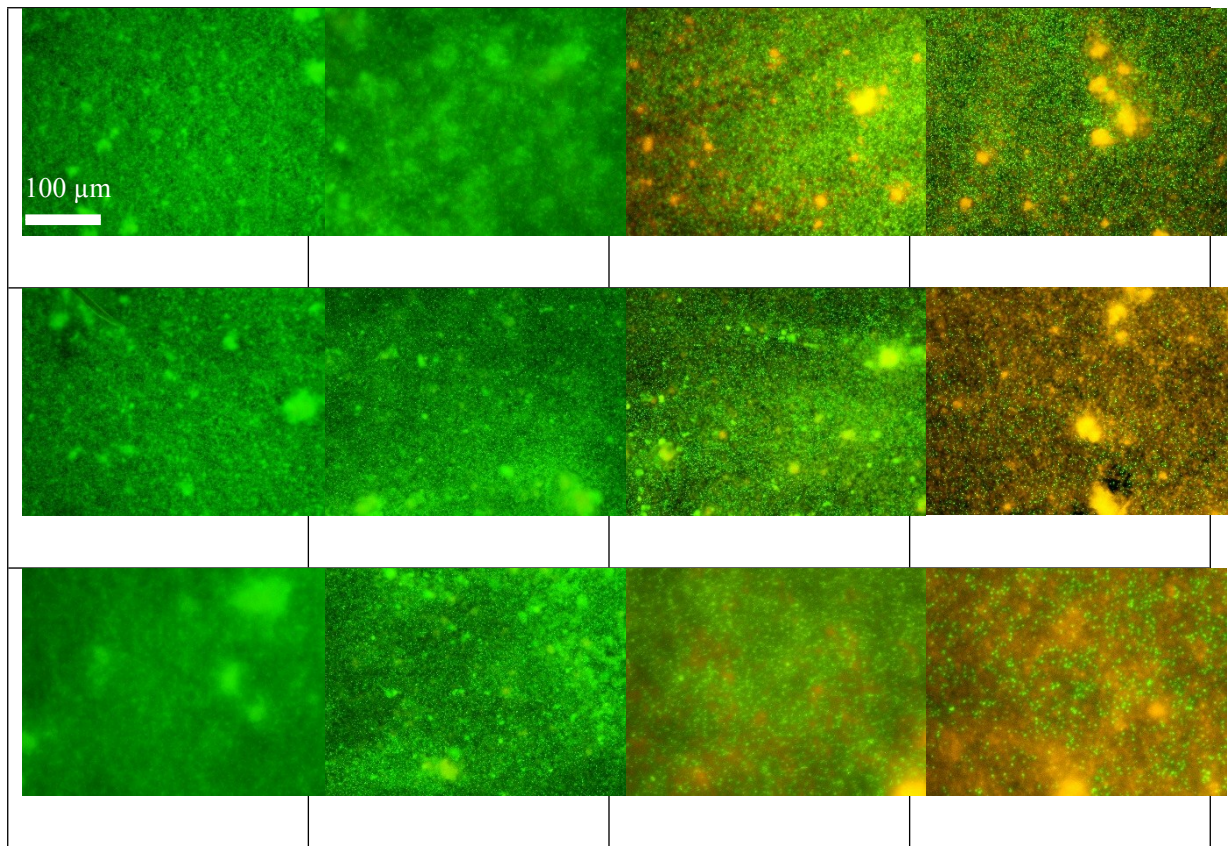

Figure S2: Additional live/dead micrographs (20x) of the dispersed *S. epidermidis* biofilm

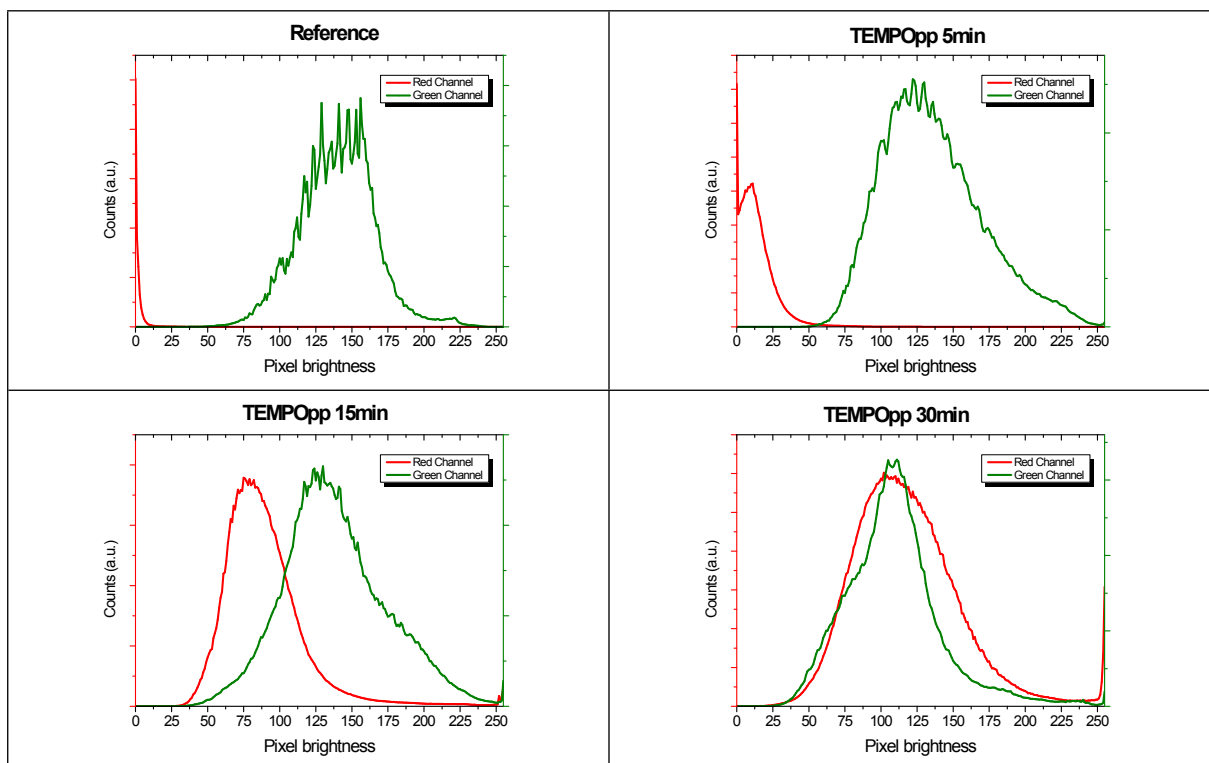

Figure S3: Histogram analysis of live / dead stain

S4:

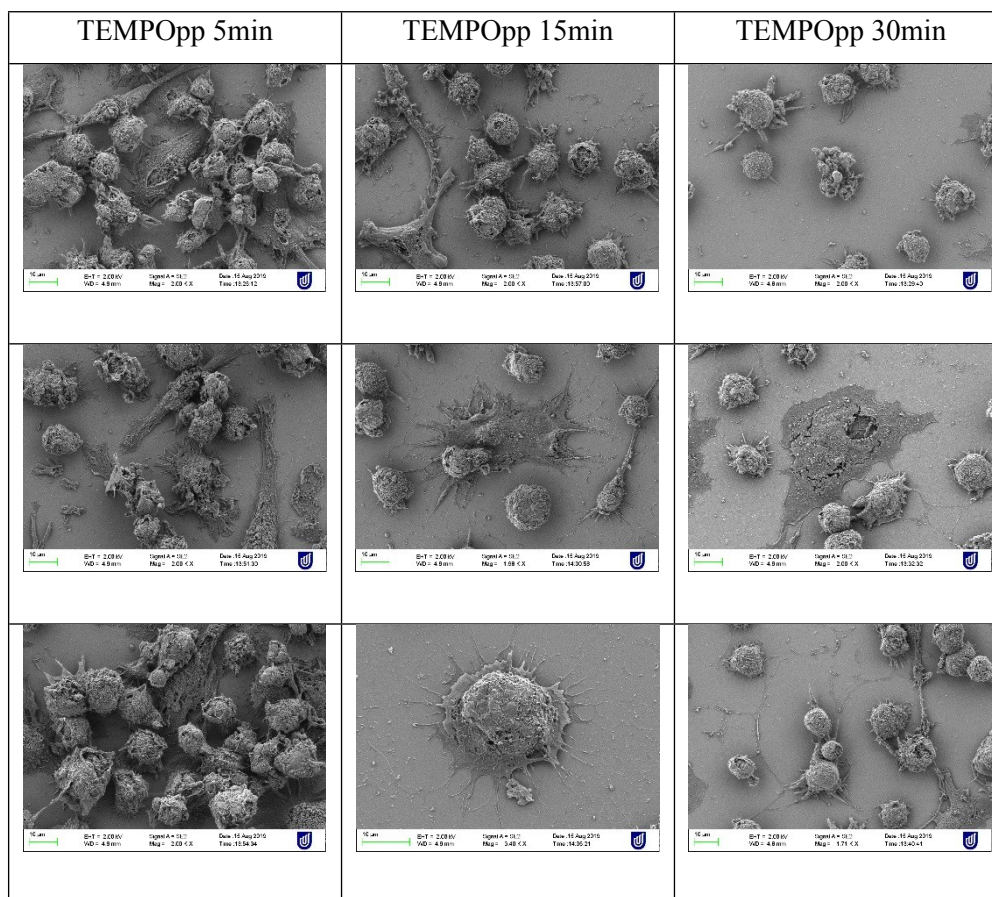

Additional SEM images of THP-1 macrophages on TEMPOpp coatings

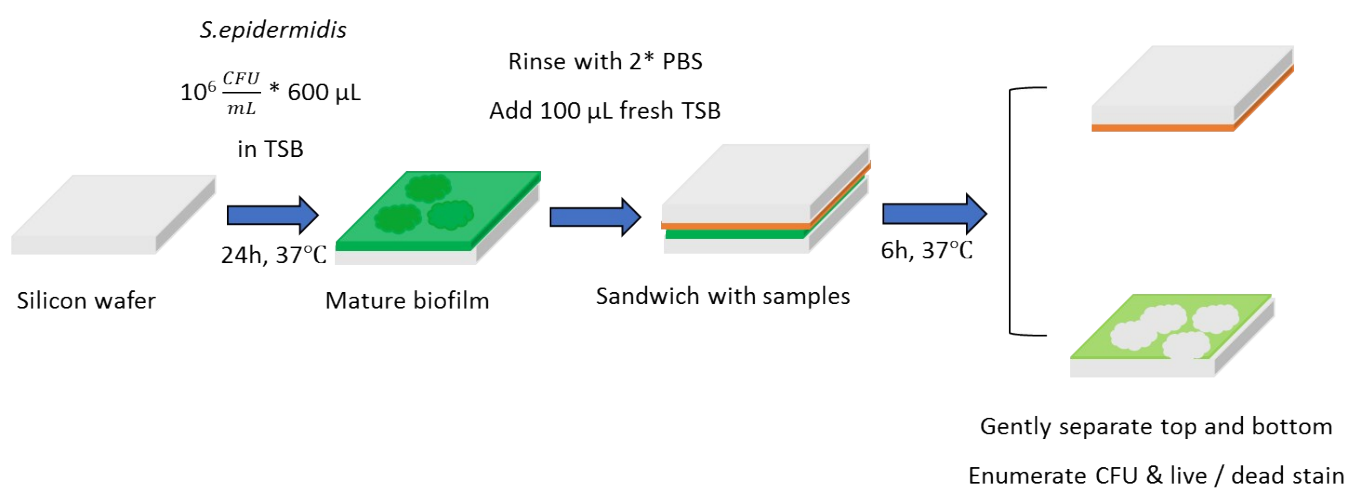

Scheme S1: The biofilm dispersion assay illustrated
